# Supplementary material for: Synoptic analysis of a decade of daily measurements of SO 2 emission in the troposphere from volcanoes of the global ground-based Network for Observation of Volcanic and Atmospheric Change
Source: Copernicus journal article supplement (doi:10.5194/essd-13-1167-2021), 2021-03-22
Supplement: Supplementary file 2 [file essd-13-1167-2021-supplement.zip]

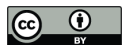

## *Supplement of*

# **Synoptic analysis of a decade of daily measurements of SO<sub>2</sub> emission in the troposphere from volcanoes of the global ground-based Network for Observation of Volcanic and Atmospheric Change**

**Santiago Arellano et al.**

*Correspondence to:* Santiago Arellano ([santiago.arellano@chalmers.se](mailto:santiago.arellano@chalmers.se))

- [essd-13-1167-2021-supplement-title-page.pdf](#)
- [S1\\_NOVAC\\_annual\\_emission.txt](#)
- [S2\\_NOVAC\\_volcanoes\\_and\\_institutions.xlsx](#)
- [S3\\_data\\_sample](#)
  - [groundbased\\_novac.scandoas.so2\\_unam032\\_popocatepetl\\_20070412t000000z\\_20161228t000000z\\_001.nc](#)
  - [groundbased\\_novac.scandoas.so2\\_unam032\\_popocatepetl\\_20070412t000000z\\_20161228t000000z\\_001.txt](#)
  - [groundbased\\_novac.scandoas.so2\\_unam032\\_popocatepetl\\_20070412t000000z\\_20161228t000000z\\_001.xml](#)
- [supplements.pdf](#)

The copyright of individual parts of the supplement might differ from the article licence.
